# Supplementary material for: A probe-free electrochemical immunosensor for methyl jasmonate based on a Cu-MOF–carboxylated graphene oxide platform
Source: Royal Society of Chemistry journal article supplement (doi:10.1039/d1ra07683c), 2022-01-01
Supplement: d1ra07683c1.pdf [file d1ra07683c1.pdf]

**A probe-free electrochemical immunosensor for methyl jasmonate  
based on Cu-MOFs-carboxylated graphene oxide platform**

Gengqi Xing<sup>a,b#</sup>, Cheng Wang<sup>a#</sup>, Junqing Qin<sup>a</sup>, Bin Luo<sup>a</sup>, Peichen Hou<sup>a</sup>, Xiaodong Wang<sup>a</sup>, Hongtu

Dong<sup>a</sup>, Jianshu Wang<sup>b\*</sup>, Aixue Li<sup>a\*</sup>

a. Intelligent Equipment Research Center, Beijing Academy of Agriculture and Forestry Sciences,  
Beijing 100097, China

b. College of Landscape and Ecological Engineering, Hebei University of Engineering, Handan  
056038, China

---

\* Corresponding author: E-mail address: wangjianshu135@163.com (J Wang),  
aixueli\_2021@163.com, liax@nercita.org.cn (A Li).

# These authors contributed equally to this work.

**Fig. S1** The XRD (A) and FTIR (B) characterization of COOH-GO, Cu-MOFs and Cu-MOF-COOH-GO.

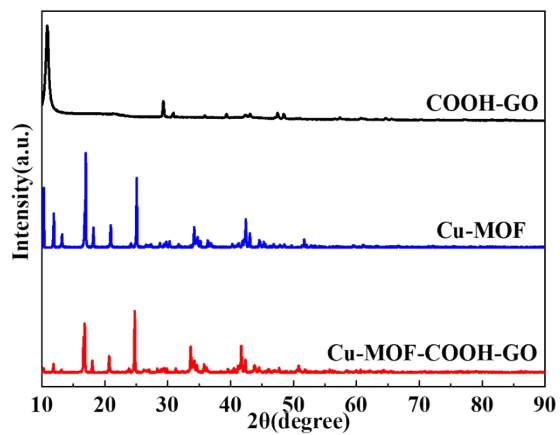

(A)

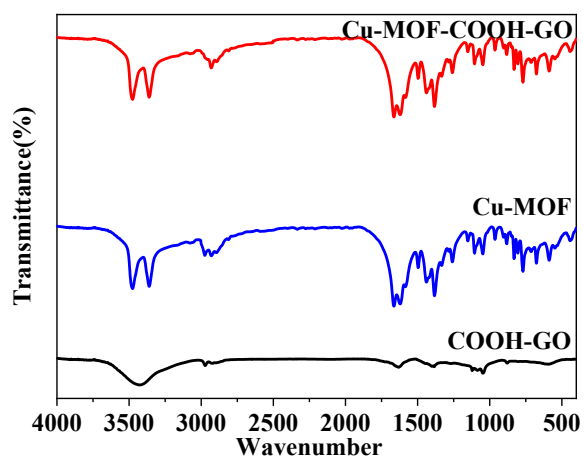

(B)

**Fig. S2** The (A) CV and (B) EIS plots of bare SPE (a), Cu-MOFs-COOH-GO/SPE (b), Anti-MeJA/Cu-MOFs-COOH-GO/SPE (c), BSA/Anti-MeJA/Cu-MOFs-COOH-GO/SPE (d), MeJA/BSA/Anti-MeJA/Cu-MOFs-COOH-GO/SPE (e) in 5 mM  $[\text{Fe}(\text{CN})_6]^{3-/4-}$  solution containing 0.1 M KCL. The concentration of MeJA is 1 nM. (C) CVs of the immunoelectrode with the sweep rate ranged from 60 to 300  $\text{mV}\cdot\text{s}^{-1}$  (a to i), the inset shows linearity of peak current vs  $v^{1/2}$ .

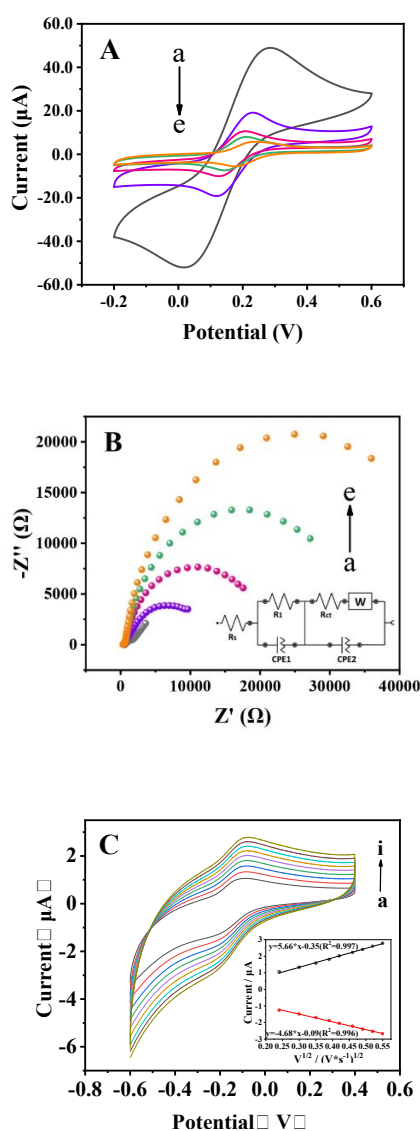

**Fig. S3** Optimization of analytical conditions. Effect of (A) incubation time of antigen (30, 40, 50, 60, and 70 min); (B) Cu-MOFs concentration (0.5, 0.75, 1.0, 1.25, and 1.5 mg mL<sup>-1</sup>); (C) COOH-GO concentration (0.5, 1.0, 1.5, 2.0, and 2.5 mg mL<sup>-1</sup>); (D) Ab concentration (0.01, 0.05, 0.10, 0.15, and 0.20 mg mL<sup>-1</sup>).

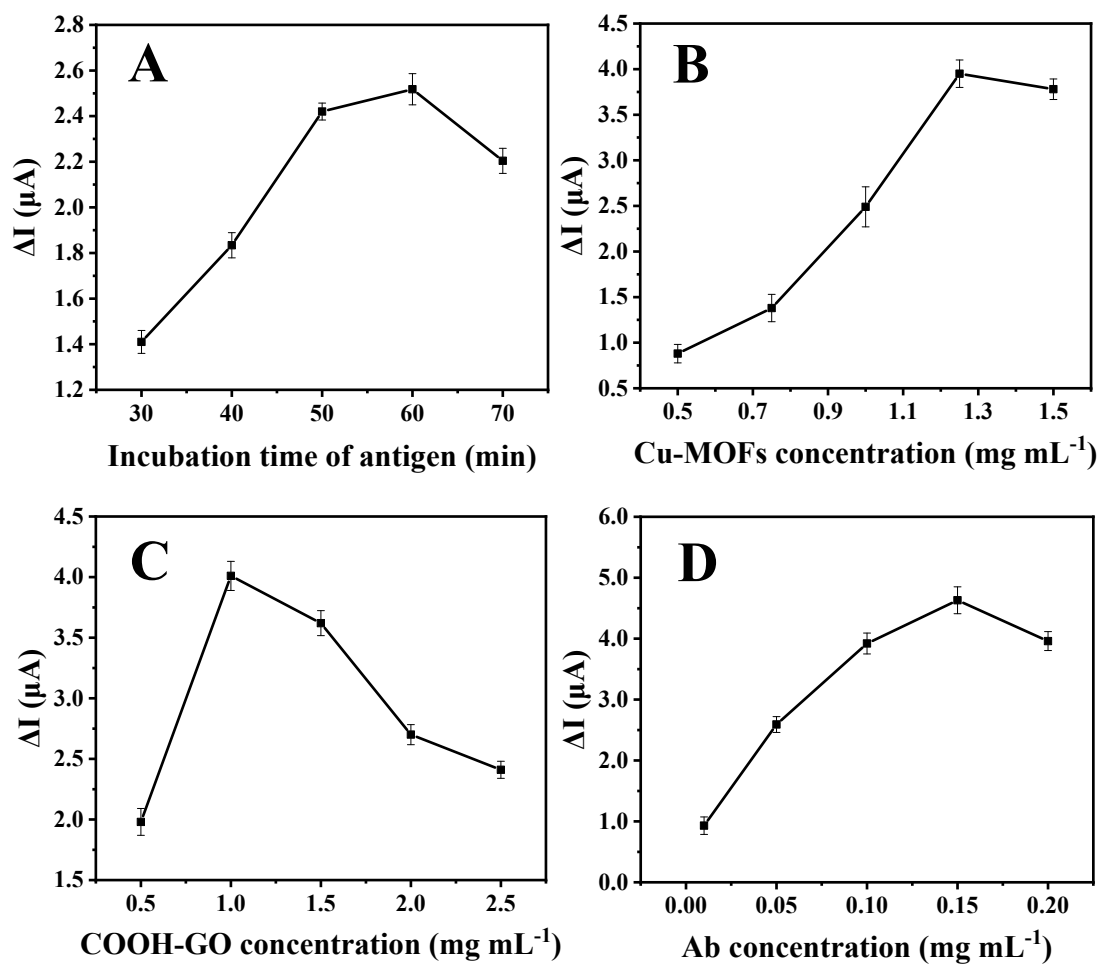

Table S1: Concentrations of MeJA in grape samples.

| Samples | immunosensor<br>(nM) | ELISA(nM) | Relative error (%) |
|---------|----------------------|-----------|--------------------|
| 1       | 7.49                 | 6.87      | 8.91               |
| 2       | 9.77                 | 10.00     | -2.31              |
| 3       | 10.79                | 9.83      | 9.77               |
| 4       | 9.15                 | 8.37      | 9.23               |
| 5       | 9.84                 | 9.96      | -1.22              |
| 6       | 12.49                | 11.17     | 11.81              |
